# Supplementary material for: Influence of Mo concentration on the structural and electrochemical properties of double-doped Mo–Co–Ni3S2/NF composites
Source: Royal Society of Chemistry journal article supplement (doi:10.1039/d3ce01246h), 2024-01-01
Supplement: d3ce01246h1.pdf [file d3ce01246h1.pdf]

## Supporting Information

### Influence of Mo Concentration on the Structural and Electrochemical Properties of Double Doped Mo-Co-Ni<sub>3</sub>S<sub>2</sub>/NF Composites

Muhammad Shoaib, Fen Qiao\*, Xiangchao Xu, Taihang Zhou, Yanzhen Liu

*School of Energy & Power Engineering, Jiangsu University, Zhenjiang 212013, P. R. China.*

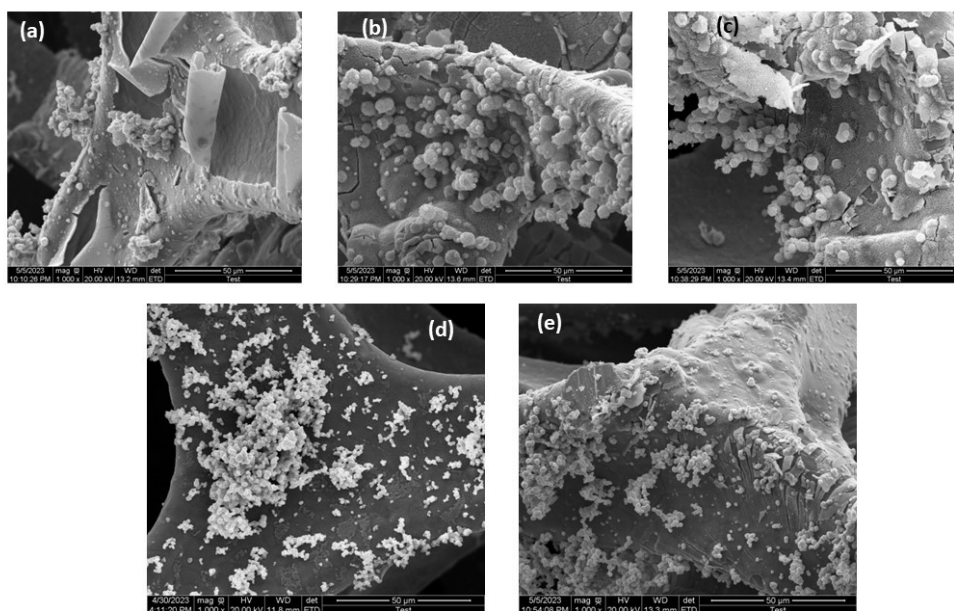

**Fig.S1** SEM images of prepared samples at 50 micro meter magnification

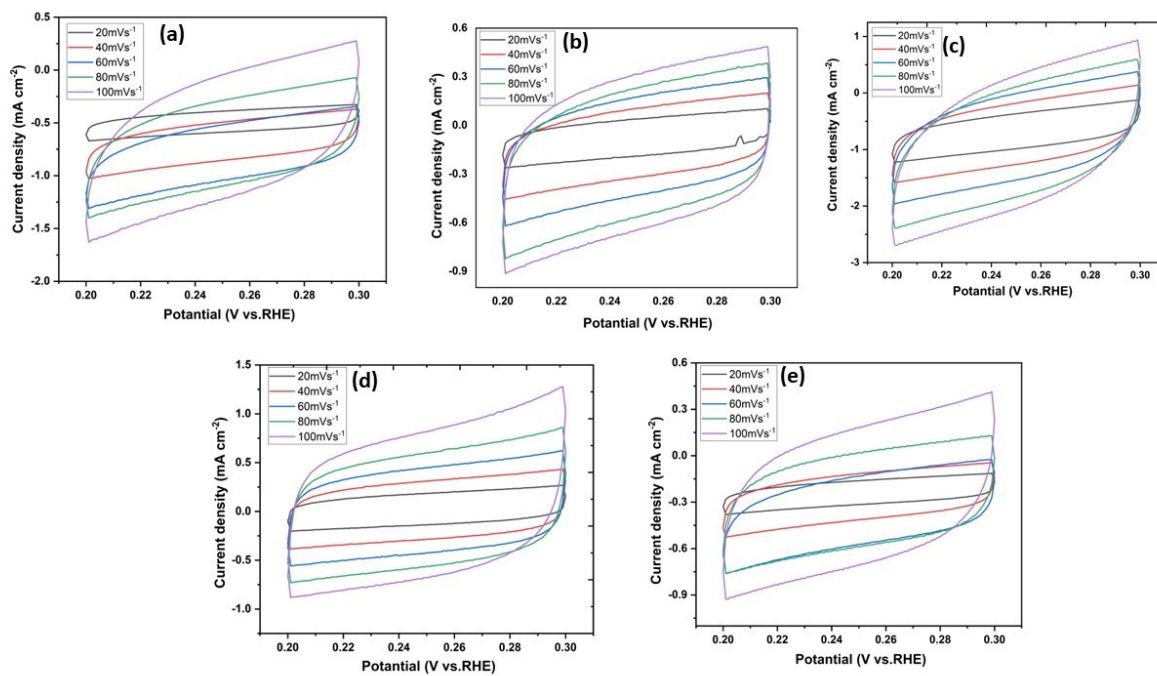

**Fig.S2** CV curves for CdI at scan rates 20,40,60,80 and100 mV s<sup>-1</sup>
